# Supplementary material for: Are Vulnerable Communities Thoroughly Informed on Mosquito Bio-Ecology and Burden?
Source: PubMed Central journal article supplement (PMC7672552; doi:10.3390/ijerph17218196), 2020-11-06
Supplement: ijerph-17-08196-s001.pdf [file ijerph-17-08196-s001.pdf]

Questionnaire Code

|                             |                             |                     |
|-----------------------------|-----------------------------|---------------------|
|                             |                             |                     |
| <i>Questionnaire number</i> | <i>Interviewer Initials</i> | <i>Sub-district</i> |

## Mosquito Knowledge, Attitude and Practices by Communities in the Serowe, Palapye and Bobirwa Sub-districts, Botswana.

### Household Questionnaire

#### GENERAL

|                     |                                     |
|---------------------|-------------------------------------|
| Respondent name(s): | Surname: _____<br>First name: _____ |
| Date :              | ____/____/____                      |
| Interviewer Name:   | ____ Interviewer ID _____           |
|                     | Sub-district: _____                 |
| Location ID :       | Village/ Town: _____                |
|                     | GPS Coordinates _____               |

#### SECTION 1.0 DEMOGRAPHICS

|     |                                                                                                                                                                         |  |
|-----|-------------------------------------------------------------------------------------------------------------------------------------------------------------------------|--|
| 1.1 | What is your gender?<br>1= Male, 2= Female                                                                                                                              |  |
| 1.2 | What is your age range?<br>1=18- 29 years, 2=30-39 years, 3=40- 49 years, 4= 50- 59 years, 5= ≥60 years                                                                 |  |
| 1.3 | What is your marital status?<br>1= Married, 2= Divorced, 3= Widowed, 4= single (never married),<br>5= Other (specify).....                                              |  |
| 1.4 | Are you disabled?<br>1= Yes, 2= No, 3= Prefer not to say                                                                                                                |  |
| 1.5 | Are you literate?<br>1= Yes, 2= No, 3= Prefer not to say                                                                                                                |  |
| 1.6 | What is your highest level of education?<br>1= None, 2= Primary, 3= JC, 4= Form 4-5 (senior), 4= vocational, 5= Tertiary, 6= Prefer not to say, 7= Other (Specify)..... |  |

Questionnaire Code

|  |  |  |
|--|--|--|
|  |  |  |
|--|--|--|

Questionnaire number      Interviewer Initials      Sub-district

|             |                                                                                                                                                                                                                                                                                                                                                  |  |
|-------------|--------------------------------------------------------------------------------------------------------------------------------------------------------------------------------------------------------------------------------------------------------------------------------------------------------------------------------------------------|--|
| <b>1.7</b>  | What is your profession?<br>1= Farmer, 2= Self-employed, 3= Entrepreneur, 4= Employee, 5= Not working, 6= Other (Specify).....                                                                                                                                                                                                                   |  |
| <b>1.8</b>  | How do you access information about mosquitoes and mosquito-borne diseases? (May select more than one).<br>1= Audio/visual source (Radio/TV), 2=Health professionals, 3=Print media (newspapers and others), 4= Electronic sources (Cellphone, computers and others) 5= Friends/ family/ relatives, 6 = Own experience, 7 = Other (Specify)..... |  |
| <b>1.9</b>  | How many of you are staying on the property?<br>1= 1-2, 2= 3-5, 3= 5-10, 4= >10                                                                                                                                                                                                                                                                  |  |
| <b>1.10</b> | Which of the following are found in your property? (May give more than one)<br>1= JoJo tank, 2= flowerpots, 3 = gutter, 4 = old tyres, 5= indoor containers, 6= None of the above, 7= Other artificial containers (Specify).....                                                                                                                 |  |
| <b>1.11</b> | If your answer is 2 in 1.10, where are the flowerpots located? (If no, continue to 1.12)<br>1= In the house, 2= Outside in the veranda/ porch/ terrace/ balcony, 3= Outside around the house, 4= Outside distant from the house, Other (Specify).....                                                                                            |  |
| <b>1.12</b> | Do you have a pit latrine in your yard? (If no, continue to 1.15)<br>1= Yes, 2= No                                                                                                                                                                                                                                                               |  |
| <b>1.13</b> | If yes to 1.12, are there signs of mosquitoes in it?<br>1=Yes, 2=No, 3= Not sure, 4= Don't know                                                                                                                                                                                                                                                  |  |
| <b>1.14</b> | Do you think it encourages mosquito breeding?<br>1=Yes, 2=No, 3= Not sure, 4= Don't know                                                                                                                                                                                                                                                         |  |
| <b>1.15</b> | Is there a drainage system in your yard? (If no, continue to 1.18)<br>1= Yes, 2= No                                                                                                                                                                                                                                                              |  |
| <b>1.16</b> | If yes to 1.15, do you think it has an effect on mosquito breeding?<br>1=Yes, 2=No, 3= Not sure, 4= Don't know                                                                                                                                                                                                                                   |  |
| <b>1.17</b> | Are there signs of mosquitoes in the drainage system?<br>1=Yes, 2=No, 3= Not sure, 4= Don't know, 5= Did not check                                                                                                                                                                                                                               |  |
| <b>1.18</b> | Do you have stagnant waters in the yard, either 'natural'/artificial? (If your answer is 2,3 or 4, continue to 2.1)<br>1=Yes, 2=No, 3= Not sure, 4= Don't know                                                                                                                                                                                   |  |
| <b>1.19</b> | If yes to 1.18, are there signs of mosquito activity?<br>1=Yes, 2=No, 3= Not sure, 4= Don't know                                                                                                                                                                                                                                                 |  |

**SECTION 2.0 KNOWLEDGE**

|            |                                                                     |  |
|------------|---------------------------------------------------------------------|--|
| <b>2.1</b> | Do you know mosquitoes? 1= Yes, 2= No, 3= Not sure, 4= I don't know |  |
|------------|---------------------------------------------------------------------|--|

Questionnaire Code

|  |  |  |
|--|--|--|
|  |  |  |
|--|--|--|

Questionnaire number      Interviewer Initials      Sub-district

|             |                                                                                                                                                                                                                         |  |
|-------------|-------------------------------------------------------------------------------------------------------------------------------------------------------------------------------------------------------------------------|--|
| <b>2.2</b>  | How do you identify them?<br>1= Colour, 2= Size, 3= Sound, 4= body parts, 5= Taxonomy key, 6= Specify.....                                                                                                              |  |
| <b>2.3</b>  | How many types of mosquitoes do you know? 1=0, 2=1, 3=2, 4=3, 5=4, 6= >5                                                                                                                                                |  |
| <b>2.4</b>  | Can you identify the different types of adult mosquitoes?<br>1= Yes, 2= No, 3 =Not sure, 4= Don't know                                                                                                                  |  |
| <b>2.5</b>  | Have you seen an adult mosquito in the last 3 months?<br>1= Yes, 2= No, 3= Not sure                                                                                                                                     |  |
| <b>2.6</b>  | If yes to 2.5, what is the colour of the mosquito(es) you have seen?<br>1= Light brownish, 2= black and white, 3= Not sure, 4= Other (Specify).....                                                                     |  |
| <b>2.7</b>  | Do you know mosquitoes go through different developmental stages?<br>1= Yes, 2= No, 3= Not sure, 4= I don't know                                                                                                        |  |
| <b>2.8</b>  | Have you ever seen the following developmental stages of mosquitoes apart from adults? (If no to all, continue to 2.10)<br>1. Eggs      Yes.....No.....<br>2. Larvae    Yes.....No.....<br>3. Pupae     Yes.....No..... |  |
| <b>2.9</b>  | If yes to 2.8, where did you see them?<br>.....                                                                                                                                                                         |  |
| <b>2.10</b> | Did you experience a mosquito bite in the last summer (October to March) in your village?<br>1= Yes, 2= No, 3= None, 4= Not sure, 5= Don't know                                                                         |  |
| <b>2.11</b> | If yes to 2.10, how many bites in a day?<br>1= Too many to count, 2= Many, 3= Moderate, 4= Few, 5= Very few                                                                                                             |  |
| <b>2.12</b> | Did you experience in your village, a mosquito bite in winter (April to July)?<br>1= Yes, 2= No, 3= None, 4= Not sure, 5= Don't know                                                                                    |  |
| <b>2.13</b> | If yes to 2.12, how many bites in a day?<br>1= Too many to count, 2= Many, 3= Moderate, 4= Few, 5= Very few                                                                                                             |  |
| <b>2.14</b> | Where did you get bitten by the mosquito? 1= Indoors, 2= Outdoors, 3= Both indoors and outdoors, 4= I don't know                                                                                                        |  |
| <b>2.15</b> | What time of the day did you normally experience mosquito bites?<br>1= Morning, 2= Noon, 3= Afternoon, 4= Evening, 5= Night, 6= Other (Specify).....                                                                    |  |
| <b>2.16</b> | Which part of the body received lots of bites?<br>1= head, 2= neck, 3= chest, 4= back area, 5= arms, 6= legs, 7= Other (Specify) .....                                                                                  |  |
| <b>2.17</b> | Do you think mosquitoes can transmit HIV during blood feed?<br>1= Yes, 2= No, 3= None, 4= Not sure, 5= Don't know                                                                                                       |  |

Questionnaire Code

|  |  |  |
|--|--|--|
|  |  |  |
|--|--|--|

Questionnaire number      Interviewer Initials      Sub-district

|             |                                                                                                                                                                                                                                                                                                                                                                                                                                                                                                                                                                                                                                                                                                     |                  |
|-------------|-----------------------------------------------------------------------------------------------------------------------------------------------------------------------------------------------------------------------------------------------------------------------------------------------------------------------------------------------------------------------------------------------------------------------------------------------------------------------------------------------------------------------------------------------------------------------------------------------------------------------------------------------------------------------------------------------------|------------------|
| <b>2.18</b> | What time of the year are mosquitoes abundant? (May choose more than one)<br>1= Winter, 2= Spring, 3= Summer, 4= Autumn, 5= All year round, 6= Not sure, 7= Other<br>(Specify).....                                                                                                                                                                                                                                                                                                                                                                                                                                                                                                                 |                  |
| <b>2.19</b> | Do mosquitoes get plenty when it is hot or cold?<br>1= Hot, 2= Cold, 3= Both Hot and Cold, 4= Not sure, 5= Don't know                                                                                                                                                                                                                                                                                                                                                                                                                                                                                                                                                                               |                  |
| <b>2.20</b> | In your opinion, what is the general trend of mosquito abundance over the past 10yrs?<br>1= increasing, 2= decreasing, 3= No change, 4= Don't know                                                                                                                                                                                                                                                                                                                                                                                                                                                                                                                                                  |                  |
| <b>2.21</b> | If your answer to 2.20 is 1, what do you think is the main contributing factor?<br>1= Temperature, 2= Precipitation, 3= hosts, 4= I don't know, 5= Other<br>(Specify).....                                                                                                                                                                                                                                                                                                                                                                                                                                                                                                                          |                  |
| <b>2.22</b> | Which diseases do you think mosquitoes may spread?<br>.....                                                                                                                                                                                                                                                                                                                                                                                                                                                                                                                                                                                                                                         |                  |
| <b>2.23</b> | Do you know signs and symptoms of any diseases you mentioned?<br>1= Yes, 2= No, 3= None, 4= Not sure, 5= Don't know                                                                                                                                                                                                                                                                                                                                                                                                                                                                                                                                                                                 |                  |
| <b>2.24</b> | If yes in 2.23, state one disease and its signs and symptoms.<br>Disease.....                                                                                                                                                                                                                                                                                                                                                                                                                                                                                                                                                                                                                       | Signs & symptoms |
| <b>2.25</b> | Do you know:<br>a (i) Yellow fever? 1=Yes, 2=No, 3= Not sure, 4= Don't know.....<br>a (ii) what vectors it .....and its parasite?.....<br>b (i) Dengue fever? 1=Yes, 2= No, 3= Not sure, 4= Don't know.....<br>b (ii) what vectors it .....and its parasite?.....<br>c (i) human malaria? 1=Yes, 2= No, 3= Not sure, 4= Don't know.....<br>c (ii) what vectors it .....and its parasite?.....<br>c (iii) how is it diagnosed locally? .....<br>d (i) Elephantiasis? 1=Yes, 2=No, 3= Not sure, 4= Don't know.....<br>d (ii) what vectors it .....and its parasite?.....<br>e (i) avian malaria? 1=Yes, 2= No, 3= Not sure, 4= Don't know.....<br>e (ii) what vectors it? .....and its parasite?..... |                  |
| <b>2.26</b> | Have you ever suffered from a mosquito-borne disease?<br>1=Yes, 2=No, 3= Not sure, 4= Don't know                                                                                                                                                                                                                                                                                                                                                                                                                                                                                                                                                                                                    |                  |
| <b>2.27</b> | Do you know anyone who suffered from a mosquito-borne disease?<br>1=Yes, 2=No, 3= Not sure, 4= Don't know                                                                                                                                                                                                                                                                                                                                                                                                                                                                                                                                                                                           |                  |
| <b>2.28</b> | If your answer to 2.26 and 2.27 is yes. Which diseases?                                                                                                                                                                                                                                                                                                                                                                                                                                                                                                                                                                                                                                             |                  |

Questionnaire Code

|                      |                      |              |
|----------------------|----------------------|--------------|
|                      |                      |              |
| Questionnaire number | Interviewer Initials | Sub-district |

|             |                                                                                                                                                                               |  |
|-------------|-------------------------------------------------------------------------------------------------------------------------------------------------------------------------------|--|
|             | .....                                                                                                                                                                         |  |
| <b>2.29</b> | Are there any new types of mosquito species in your area that were not here before?<br>1=Yes, 2=No, 3= Not sure, 4= Don't know                                                |  |
| <b>2.30</b> | Do you have cattle in your area/ village?<br>1=Yes, 2=No, 3= Not sure, 4= Don't know                                                                                          |  |
| <b>2.31</b> | If yes to 2.30, are there reared in fenced farms or unfenced communal areas?<br>1= Fenced farms, 2=Unfenced communal areas, 3= Not sure, 4= Don't know                        |  |
| <b>2.32</b> | As far as Cattle interact with the environment, do you think this may have an effect in mosquito numbers?<br>1=Yes, 2=No, 3= Not sure, 4= Don't know                          |  |
| <b>2.33</b> | Do you think cattle dung (and other waste products) dropped in water bodies can be a good resource for breeding mosquitoes?<br>1=Yes, 2=No, 3= Not sure, 4= Don't know        |  |
| <b>2.34</b> | If water is contaminated with dung, what effect do you think it has on the numbers of breeding mosquitoes?<br>1= Increase, 2= Decrease, 3= Same, 4= Not sure, 5= I don't know |  |

**SECTION 3.0 ATTITUDE**

|            |                                                                                                                                                                                                                   |  |
|------------|-------------------------------------------------------------------------------------------------------------------------------------------------------------------------------------------------------------------|--|
| <b>3.1</b> | What do you think about the 'economic' significance of mosquitoes in your area?<br>1= No concern, 2= Pose a health risk, 3= Nuisance 4= Other (Specify) .....                                                     |  |
| <b>3.2</b> | Could one mosquito bite be of any health risk?<br>1=Yes, 2=No, 3=Not sure, 4= Never                                                                                                                               |  |
| <b>3.3</b> | After being bitten by a mosquito, what do you do?<br>1= Nothing, 2= consider protective measures, 3= wait for fever symptoms, 4= visit a clinic, 5= Other (Specify).....                                          |  |
| <b>3.4</b> | How can you rate your concern on a mosquito-borne infection?<br>1= Strongly concerned, 2= concerned, 3= Less concerned, 4= Not concerned                                                                          |  |
| <b>3.5</b> | What do you do to discourage mosquito breeding and resting habitats in your property? (May choose more than one)<br>1= Land clearing, 2=eliminating water holding containers, 3= Nothing, 4= Other (Specify)..... |  |
| <b>3.6</b> | What mosquito training do you need?<br>1= Biology, 2= Identification, 3= Ecology, 4= I do not want, 5= Other (Specify).....                                                                                       |  |

**SECTION 4.0 PRACTICES**

Questionnaire Code

|  |  |  |
|--|--|--|
|  |  |  |
|--|--|--|

Questionnaire number      Interviewer Initials      Sub-district

|             |                                                                                                                                                                                                                                                           |  |
|-------------|-----------------------------------------------------------------------------------------------------------------------------------------------------------------------------------------------------------------------------------------------------------|--|
| <b>4.1</b>  | Which method do you use to protect against mosquitoes indoors?<br>1= Spray with insecticides, 2= Physical kill when spotted, 3= Use bed nets, 4= Electric fan, 5= Mosquito coil, 6= Burning cow dung, 7= Window gauze 8= Nothing, 9= Other (Specify)..... |  |
| <b>4.2</b>  | If your answer to 4.1 is either 1, 2, 3, 4, 5, 6 or 7, which one(s) are most effective?<br>.....                                                                                                                                                          |  |
| <b>4.3</b>  | How do you and your family protect yourselves from mosquito bites?<br>1= Stay indoors in the evening, 2= Wear long cloths/ sleeves, 3= Apply repellents, 4= Nothing, 5= Other (Specify).....                                                              |  |
| <b>4.4</b>  | If your answer to 4.3 is either 1, 2 or 3, which one (s) are most effective?<br>.....                                                                                                                                                                     |  |
| <b>4.5</b>  | Is the government spraying your houses to control mosquitoes? (If no, continue to 4.10)<br>1=Yes, 2= No, 3=Not sure, 4= I don't know                                                                                                                      |  |
| <b>4.6</b>  | If yes to 4.5, which chemicals are used for spraying?<br>_____                                                                                                                                                                                            |  |
| <b>4.7</b>  | Do you think indoor residual spraying (IRS) is effective in controlling indoor resting mosquitoes?<br>1= Yes, 2=No, 3= Not sure, 4= I don't know                                                                                                          |  |
| <b>4.8</b>  | After spraying, what happens to mosquito population densities indoors?<br>1= Increase, 2= Reduce, 3= Same, 4= Not sure, 5= I don't know.                                                                                                                  |  |
| <b>4.9</b>  | After spraying, what happens to mosquito biting rates?<br>1= Increase, 2= Reduce, 3= Same, 4= Not sure, 5= I don't know.                                                                                                                                  |  |
| <b>4.10</b> | Are there certain parts of the village where mosquitoes are more than others?<br>1=Yes, 2=No, 3=Not sure, 4= I don't know                                                                                                                                 |  |
| <b>4.11</b> | If yes to 4.10, where and why?<br>.....<br>.....                                                                                                                                                                                                          |  |
| <b>4.12</b> | Do you know of any animals/ organisms that eat adult mosquito?<br>1 = Yes, 2=No, 3 = Not sure                                                                                                                                                             |  |
| <b>4.13</b> | If yes to 4.12, do you know which ones?.....                                                                                                                                                                                                              |  |
| <b>4.14</b> | Do you know any animals/ organisms that eat mosquito juveniles (egg-pupa)?<br>1= Yes, 2=No, 3 = Not sure                                                                                                                                                  |  |
| <b>4.15</b> | If yes to 4.14, Which ones? .....                                                                                                                                                                                                                         |  |

Questionnaire Code

|  |  |  |
|--|--|--|
|  |  |  |
|--|--|--|

*Questionnaire number      Interviewer Initials      Sub-district*

|             |                                                                                                                                                                                                                                                       |  |
|-------------|-------------------------------------------------------------------------------------------------------------------------------------------------------------------------------------------------------------------------------------------------------|--|
| <b>4.16</b> | Cross boarder trading that traverse Serowe, Palapye and/or Bobirwa sub-districts have the risk of imported mosquito-borne infections. Do you agree with this notion?<br>1= Strongly agree, 2= Agree, 3= Disagree, 4= Strongly disagree, 5= Don't know |  |
| <b>4.17</b> | Do you think cross-border screening of infectious diseases and foreign biological samples effectively carried out?<br>1=Yes, 2=No, 3= Sometimes, 4= Not sure, 5= Never, 6 Don't know                                                                  |  |
| <b>4.18</b> | Have you ever travelled to malaria endemic district/ sub-districts (Okavango, Ngamiland, Boteti, Chobe, Tutume, and Bobirwa)? If no continue to 4.21.<br>1=Yes, 2=No, 3= I can't remember                                                             |  |
| <b>4.19</b> | If yes to 4.18, how long was your stay?<br>1= less than one week, 2= up to two weeks, 3= more than two weeks                                                                                                                                          |  |
| <b>4.20</b> | Did you take any prescribed medication to these malaria endemic districts?<br>1=Yes, 2=No, 3= I can't remember                                                                                                                                        |  |
| <b>4.21</b> | Do you know any indigenous/ exotic plant that is used to repel mosquitoes?<br>1=Yes, 2=No, 3= Not sure, 4= Don't know                                                                                                                                 |  |
| <b>4.22</b> | If yes to 4.21, which one(s)?.....                                                                                                                                                                                                                    |  |
| <b>4.23</b> | Do you know any indigenous/ exotic plant that treats mosquitoes-borne diseases?<br>1=Yes, 2=No, 3= Not sure, 4= Don't know                                                                                                                            |  |
| <b>4.24</b> | If yes to 4.23, specify which.....                                                                                                                                                                                                                    |  |
| <b>4.25</b> | Is there sufficient and available diagnosis and treatment for mosquito-borne diseases in your locality?<br>1=Yes, 2=No, 3= Not sure, 4= Don't know                                                                                                    |  |
| <b>4.26</b> | Is information sharing and awareness practices on mosquitoes and control measures sufficient in your area?<br>1=Yes, 2=No, 3= Not sure, 4= Don't know                                                                                                 |  |
| <b>4.27</b> | If no to 4.26, what can be done to better the situation?<br>1= Public education, 2= Community training, 3= Workshops, 4= Campaigns, 5= Not sure, 6= Other (Specify).....                                                                              |  |
